# Supplementary material for: The comprehensive analysis of the prognostic and functional role of N-terminal methyltransferases 1 in pan-cancer
Source: PeerJ journal article supplement (doi:10.7717/peerj.16263), 2023-10-24

Expression of NTMT1 across cancers (with tumor and normal samples)

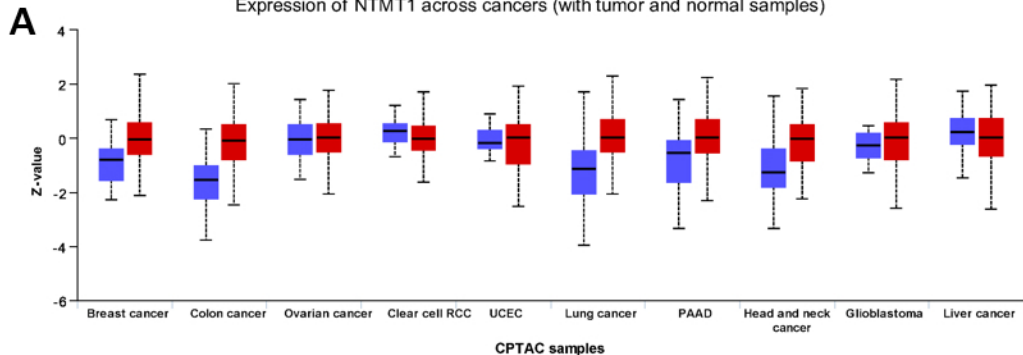

Protein expression of NTMT1 across pan cancer subtype

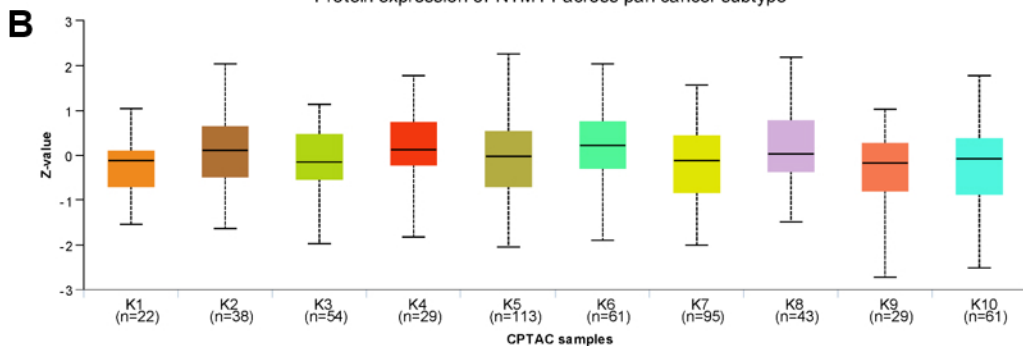

Protein expression of NTMT1 across pan cancer subtype2

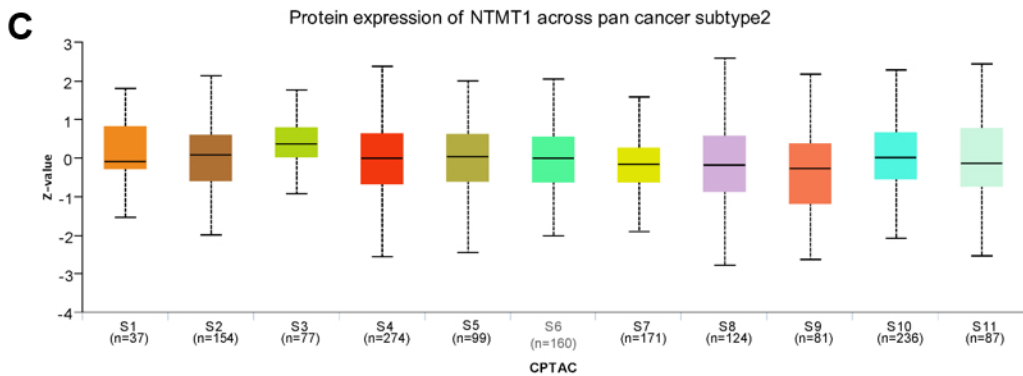

Supplement: figureS1.pdf [file figureS1.pdf]
