# Supplementary material for: The comprehensive analysis of the prognostic and functional role of N-terminal methyltransferases 1 in pan-cancer
Source: PeerJ journal article supplement (doi:10.7717/peerj.16263), 2023-10-24

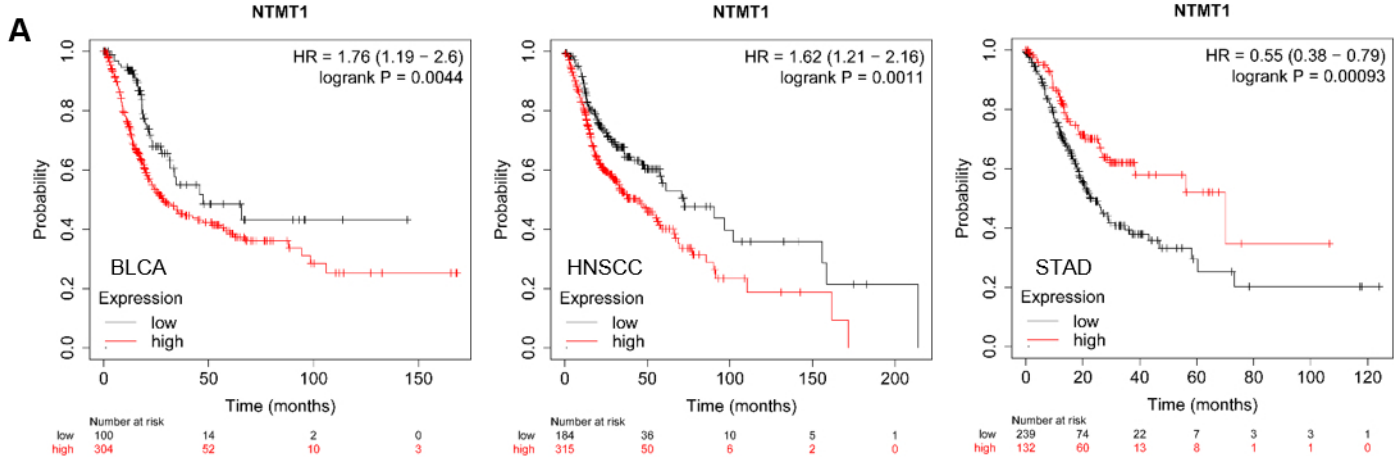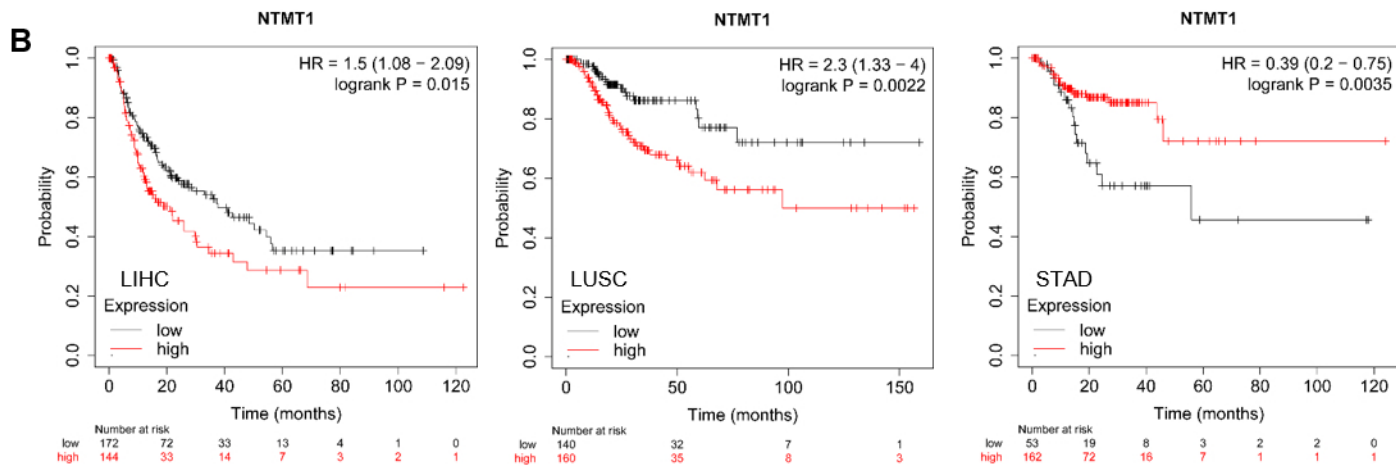

Supplement: figureS2.pdf [file figureS2.pdf]
