# Supplementary material for: The comprehensive analysis of the prognostic and functional role of N-terminal methyltransferases 1 in pan-cancer
Source: PeerJ journal article supplement (doi:10.7717/peerj.16263), 2023-10-24

**A** Promoter methylation level of NTMT1 in BRCA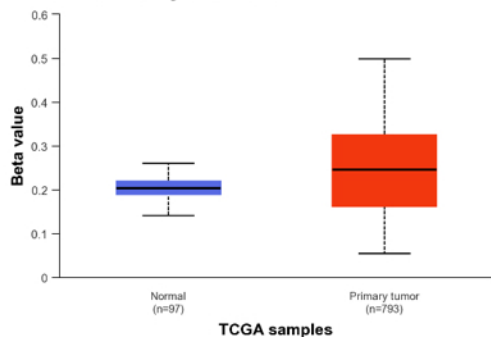**B** Promoter methylation level of NTMT1 in CHOL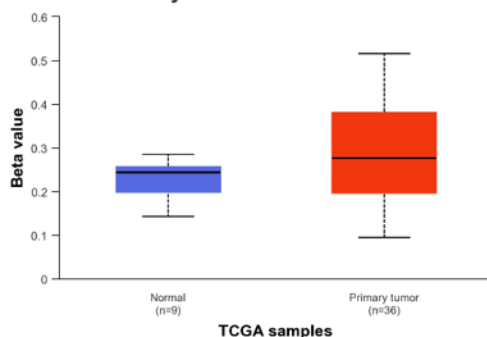**C** Promoter methylation level of NTMT1 in PAAD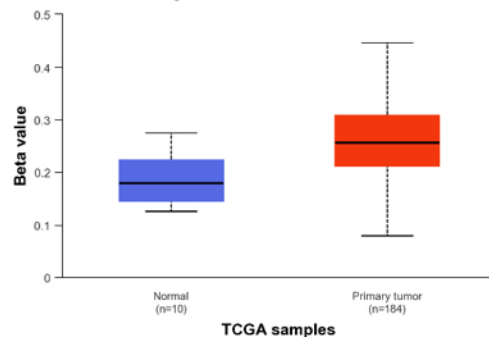**D** Promoter methylation level of NTMT1 in LUAD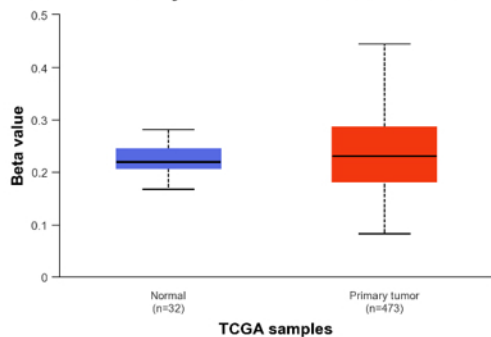**E** Promoter methylation level of NTMT1 in KIRP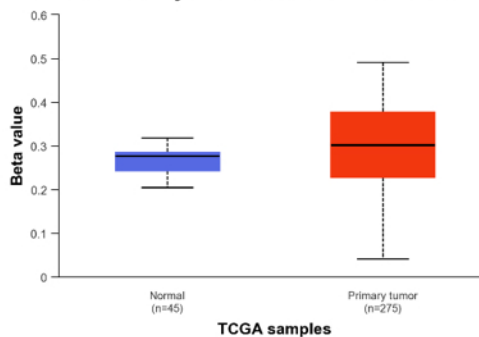**F** Promoter methylation level of NTMT1 in COAD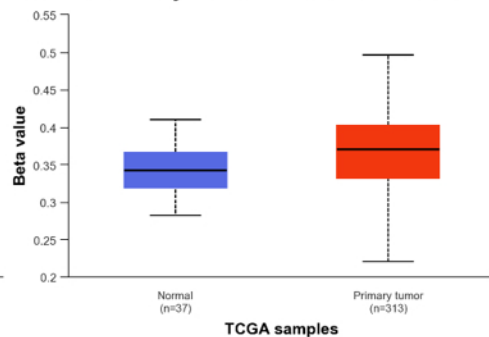**G** Promoter methylation level of NTMT1 in READ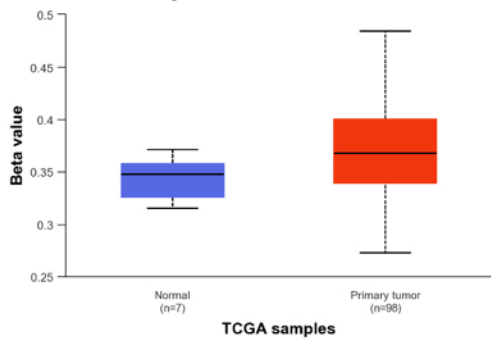**H** Promoter methylation level of NTMT1 in SARC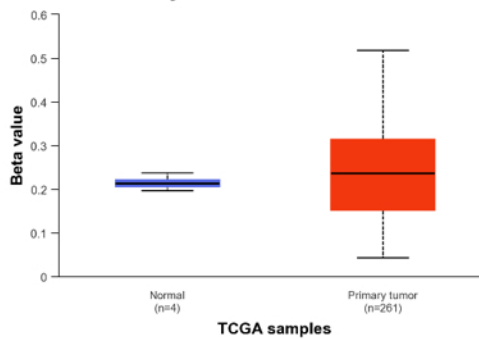**I** Promoter methylation level of NTMT1 in THCA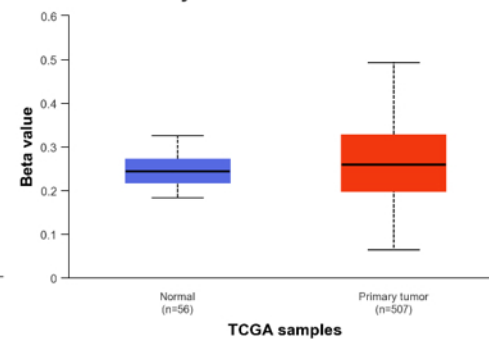

Supplement: figureS3.pdf [file figureS3.pdf]
