# Supplementary material for: The comprehensive analysis of the prognostic and functional role of N-terminal methyltransferases 1 in pan-cancer
Source: PeerJ journal article supplement (doi:10.7717/peerj.16263), 2023-10-24
Supplement: table_S1.pdf [file table_S1.pdf]

| Gene Symt | Gene ID            |
|-----------|--------------------|
| SURF2     | ENSG00000148291.9  |
| PPM1G     | ENSG00000115241.10 |
| ZMYND19   | ENSG00000165724.5  |
| PSMB7     | ENSG00000136930.12 |
| RUVBL2    | ENSG00000183207.12 |
| ELOF1     | ENSG00000130165.10 |
| DRG1      | ENSG00000185721.11 |
| TUBG1     | ENSG00000131462.7  |
| SSNA1     | ENSG00000176101.11 |
| MRGBP     | ENSG00000101189.6  |
| CDKN3     | ENSG00000100526.19 |
| SWI5      | ENSG00000175854.11 |
| RPL26L1   | ENSG00000037241.7  |
| WDR5      | ENSG00000196363.9  |
| PDXK      | ENSG00000160209.18 |
| REX04     | ENSG00000148300.11 |
| TBL2      | ENSG00000106638.15 |
| AURKAIP1  | ENSG00000175756.13 |
| NELFE     | ENSG00000204356.11 |
| ARPC5L    | ENSG00000136950.13 |
| TUBB4B    | ENSG00000188229.5  |
| WDR53     | ENSG00000185798.7  |
| RANGAP1   | ENSG00000100401.19 |
| LYAR      | ENSG00000145220.13 |
| BRAP      | ENSG00000089234.15 |
| LRWD1     | ENSG00000161036.10 |
| ZNHIT2    | ENSG00000174276.6  |
| PMPCA     | ENSG00000165688.11 |
| THOP1     | ENSG00000172009.14 |
| EFCAB11   | ENSG00000140025.15 |
| ODF2      | ENSG00000136811.16 |
| HMOX2     | ENSG00000103415.11 |
| GTF2A2    | ENSG00000140307.10 |
| SAC3D1    | ENSG00000168061.13 |
| WDR62     | ENSG00000075702.16 |
| FAM104A   | ENSG00000133193.12 |
| LMNB2     | ENSG00000176619.10 |
| MED27     | ENSG00000160563.13 |
| UBE2J2    | ENSG00000160087.20 |
| ELP5      | ENSG00000170291.14 |
| FAM220A   | ENSG00000178397.12 |
| C16orf95  | ENSG00000260456.6  |
| SLC39A3   | ENSG00000141873.10 |
| POLR2D    | ENSG00000144231.10 |
| SLC35E4   | ENSG00000100036.12 |
| LRR1      | ENSG00000165501.16 |
| NSUN4     | ENSG00000117481.10 |
| RP1-198K1 | ENSG00000275457.1  |
| CLPB      | ENSG00000162129.12 |
| NOC4L     | ENSG00000184967.6  |
| RNF114    | ENSG00000124226.10 |
| NOSIP     | ENSG00000142546.13 |
| AC005076  | ENSG00000224046.1  |

LACE1 ENSG00000135537.16  
CREM ENSG00000095794.19  
MEA1 ENSG00000124733.3  
PSMG1 ENSG00000183527.11  
RP1-191J1 ENSG00000272476.1  
AC002467. ENSG00000241764.3  
CCT7 ENSG00000135624.15  
SLC38A7 ENSG00000103042.8  
COPRS ENSG00000172301.10  
CETN3 ENSG00000153140.8  
FAM92A1 ENSG00000188343.12  
NDUFA8 ENSG00000119421.6  
SLC2A8 ENSG00000136856.17  
MLF1 ENSG00000178053.17  
MAPKAP1 ENSG00000119487.16  
SPATA33 ENSG00000167523.13  
HSF2BP ENSG00000160207.8  
C9orf40 ENSG00000135045.6  
NFKBIB ENSG00000104825.16  
GPR137 ENSG00000173264.13  
POC1A ENSG00000164087.7  
PGP ENSG00000184207.8  
KDM4D ENSG00000186280.6  
KIF2C ENSG00000142945.12  
LRRC73 ENSG00000204052.4  
DNAL1 ENSG00000119661.14  
PSMC3IP ENSG00000131470.14  
RP11-961A ENSG00000277597.1  
CMC2 ENSG00000103121.8  
MED26 ENSG00000105085.10  
CEP83-AS1 ENSG00000278916.1  
POMT2 ENSG00000009830.11  
RP11-61N2 ENSG00000226268.3  
RP11-96K1 ENSG00000273010.1  
FAM229B ENSG00000203778.7  
TMPOP2 ENSG00000262904.1  
LINC00467 ENSG00000153363.12  
RP11-524C ENSG00000260830.1  
TEX30 ENSG00000151287.16  
APITD1-CC ENSG00000251503.7  
DBF4P1 ENSG00000235489.4  
THUMPD3 ENSG00000134077.15  
TTLL5 ENSG00000119685.19  
PKMYT1 ENSG00000127564.16  
FBXW5 ENSG00000159069.13  
PDRG1 ENSG00000088356.5  
C11orf71 ENSG00000282682.1
